# Supplementary material for: SARS-CoV-2 Infection in Unvaccinated High-Risk Pregnant Women in the Bronx, NY, USA Is Associated with Decreased Apgar Scores and Placental Villous Infarcts
Source: MDPI journal article supplement (doi:10.3390/biom13081224), 2023-08-06
Supplement: s1 [file s1]

| <b><u>Placental Abnormality</u></b>          | <b><u>Criteria for Diagnosis</u></b>                                                                                                                                                                                                 |
|----------------------------------------------|--------------------------------------------------------------------------------------------------------------------------------------------------------------------------------------------------------------------------------------|
| <b><u>Maternal Vascular Malperfusion</u></b> |                                                                                                                                                                                                                                      |
| Small for gestational age placenta           | Placental weight less than tenth percentile for gestational age                                                                                                                                                                      |
| Distal villous hypoplasia                    | Decreased number of terminal chorionic villi relative to stem chorionic villi, elongated and thin chorionic villi with increased syncytial knots; findings present in lower two-thirds of section, occupying at least 30% of section |
| Villous congestion                           | Terminal chorionic villous vessels filled with confluent erythrocytes; finding present in at least 50% of villous parenchyma                                                                                                         |
| Villous infarct                              | Well-circumscribed area of coagulative necrosis containing ghost villi                                                                                                                                                               |
| Intervillous thrombus                        | Well-circumscribed area of clotted blood with laminations, displacing chorionic villi                                                                                                                                                |
| Decidual vasculopathy                        | Spiral arteries with incomplete remodeling, hypertrophic change, fibrinoid necrosis, thrombosis or atherosclerosis                                                                                                                   |
| <b><u>Inflammatory Responses</u></b>         |                                                                                                                                                                                                                                      |
| Chorioamnionitis                             | Fetal membranes containing neutrophils involving chorion and/or amnion                                                                                                                                                               |
| Funisitis                                    | Umbilical cord containing neutrophils involving at least one vessel                                                                                                                                                                  |
